# Supplementary material
Source: MDPI journal article supplement (https://www.mdpi.com/2073-4395/13/2/477)
Supplement: s1 [file s1 › agronomy-2152340-supplementary.pdf]

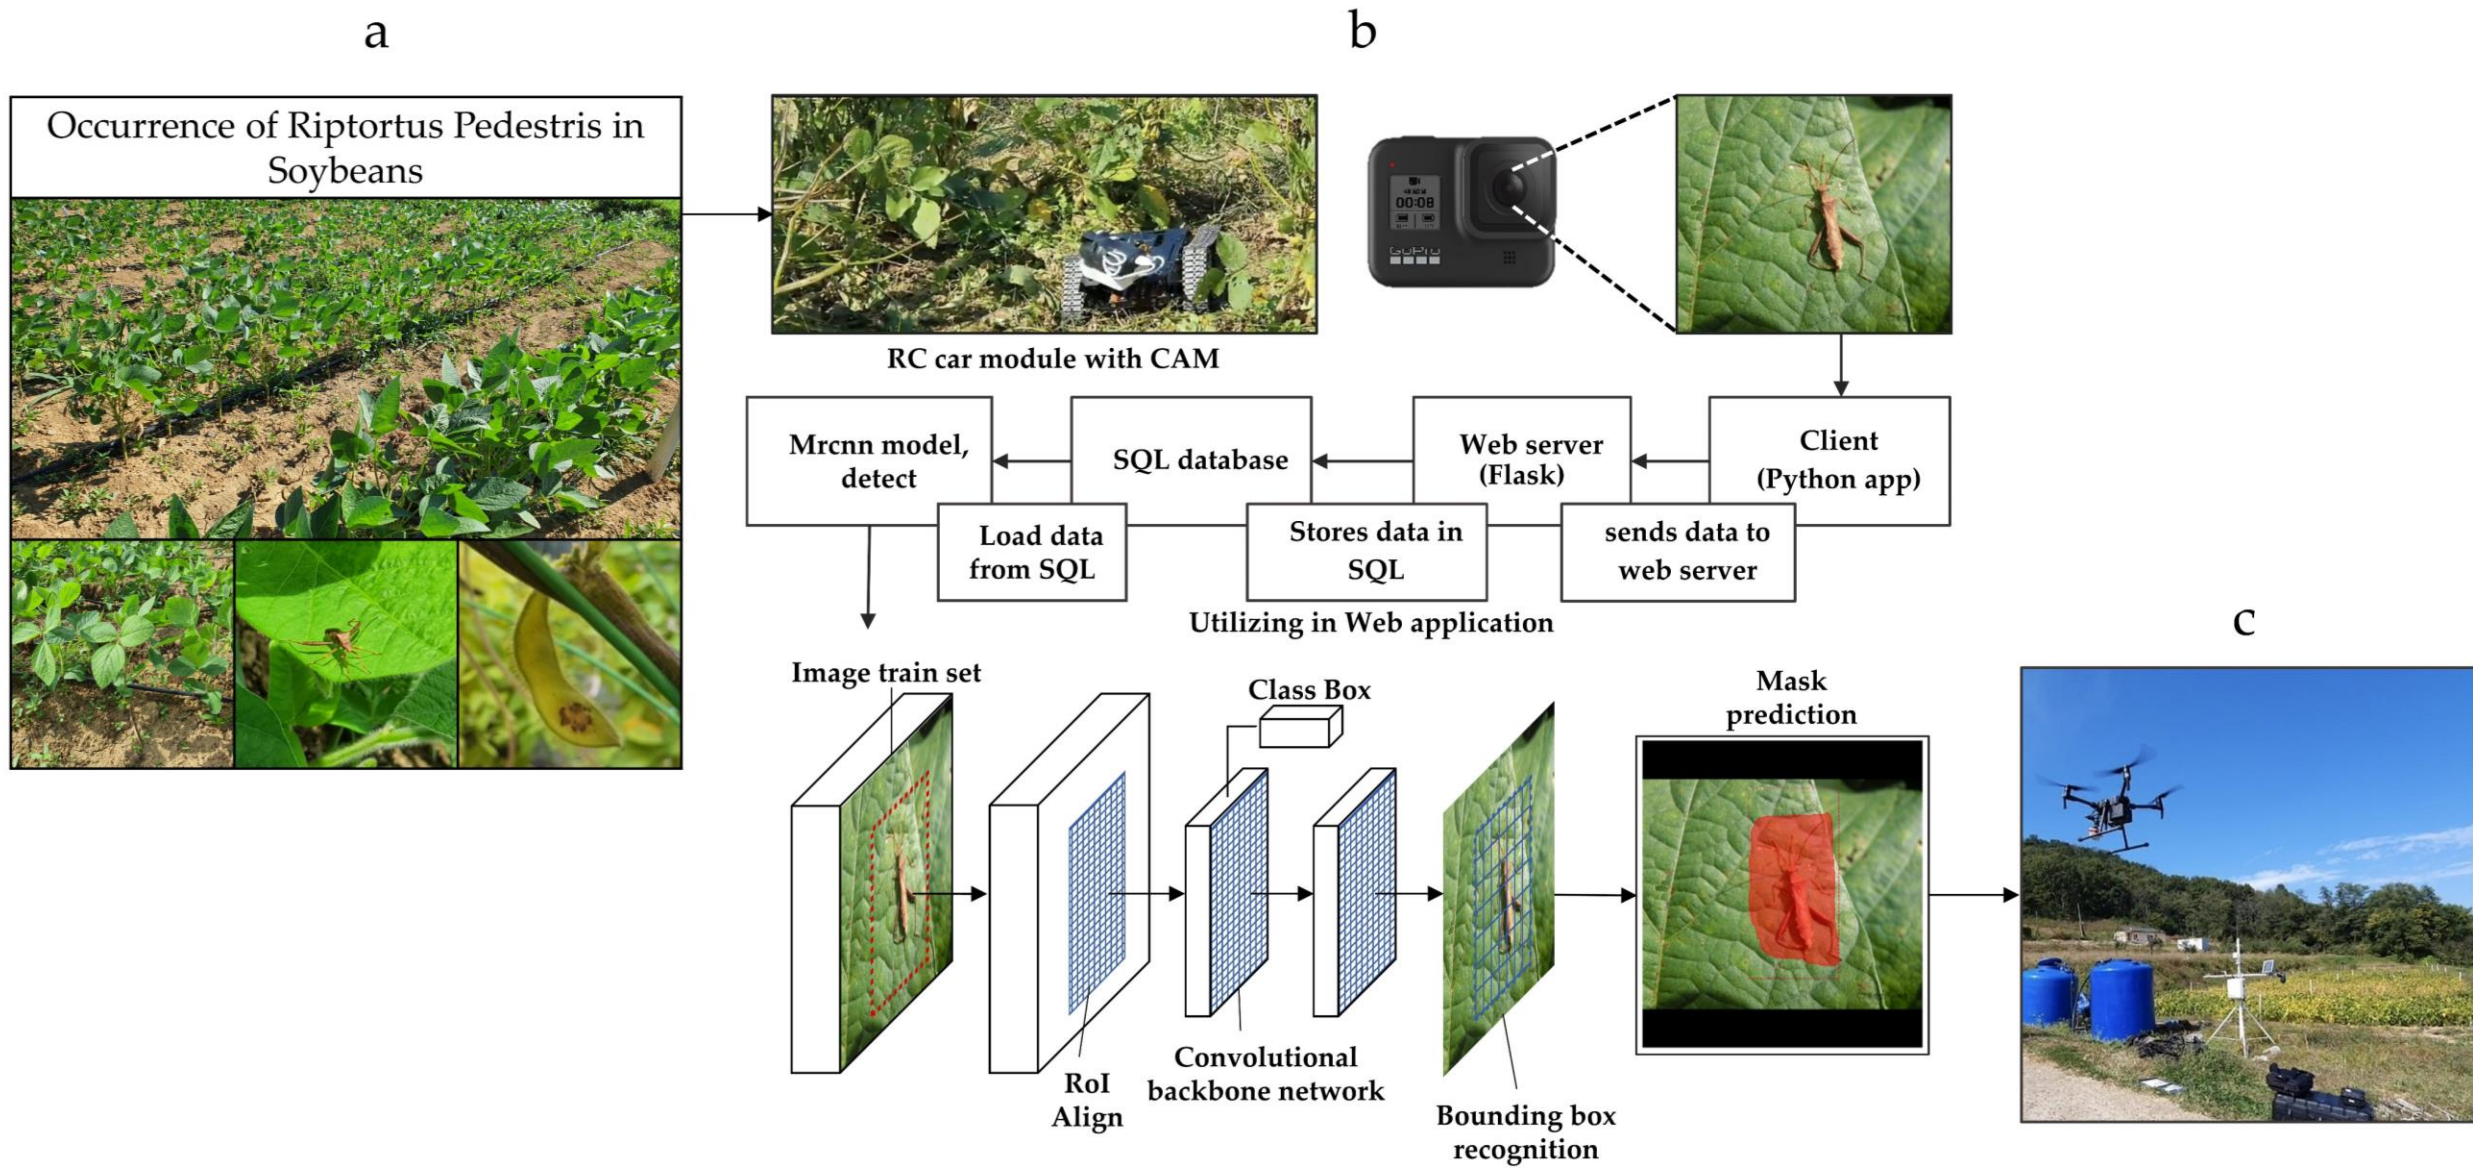

**Supplementary FigureS1.** **a.** *R. pedestris* in the soybean field cause plate-shaped pod by sucking. **b.** AI-based object detection model using image data of *R. pedestris*. **c.** Agronomic treatment for population decline after forecasting using the model.
